# Supplementary material for: Life History Recorded in the Vagino-cervical Microbiome Along with Multi-omes
Source: PubMed Central journal article supplement (PMC9684086; doi:10.1016/j.gpb.2021.01.005), 2021-06-09

**A**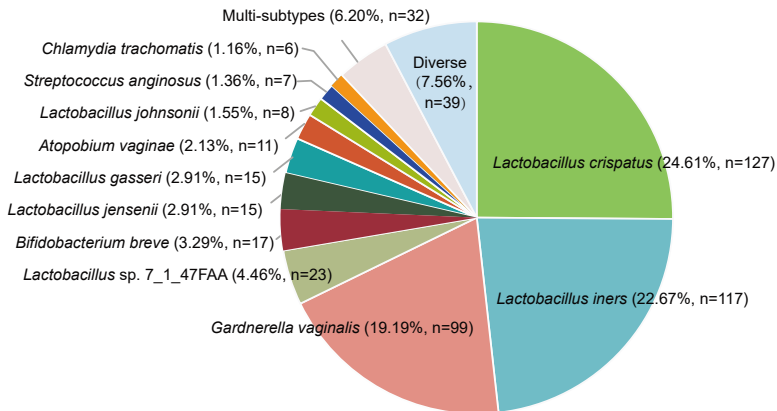**B**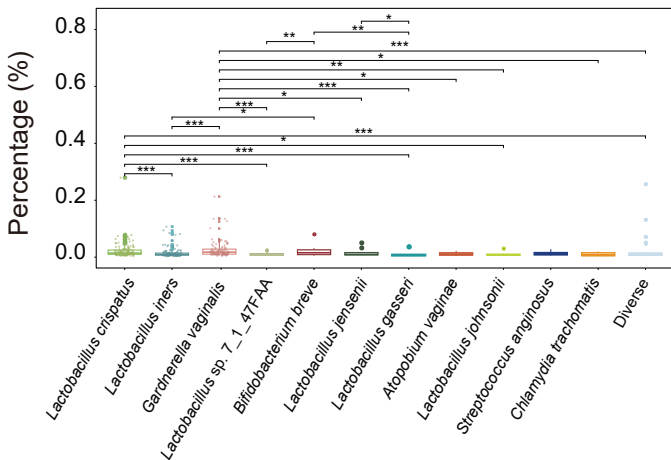

Supplement: mmc1.pdf [file mmc1.pdf]
