# Supplementary material for: Life History Recorded in the Vagino-cervical Microbiome Along with Multi-omes
Source: PubMed Central journal article supplement (PMC9684086; doi:10.1016/j.gpb.2021.01.005), 2021-06-09
Supplement: mmc2.pdf [file mmc2.pdf]

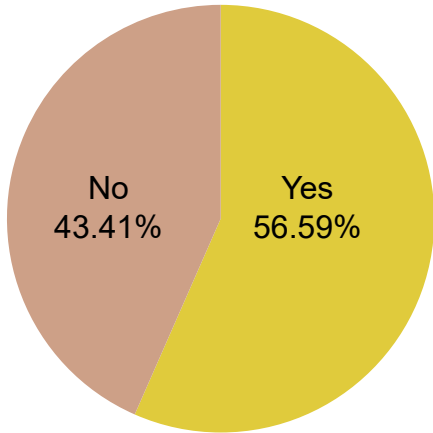

Pregnancy history

0 1 2 3 4 5 6 N/A

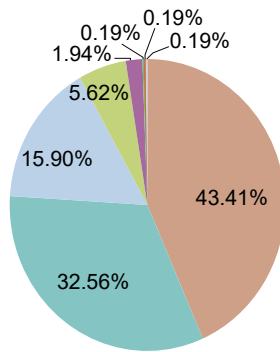

Number of pregnancy

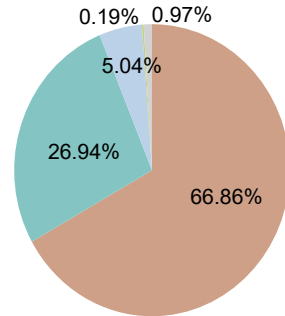

Number of vaginal deliveries

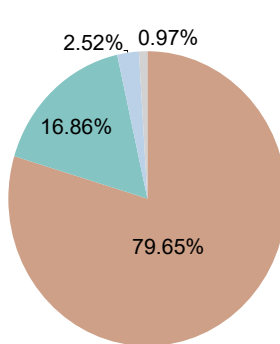

Number of caesarean section

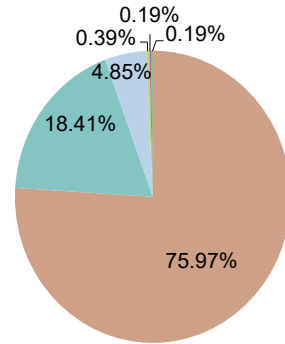

Number of abortion
