# Supplementary material for: Life History Recorded in the Vagino-cervical Microbiome Along with Multi-omes
Source: PubMed Central journal article supplement (PMC9684086; doi:10.1016/j.gpb.2021.01.005), 2021-06-09

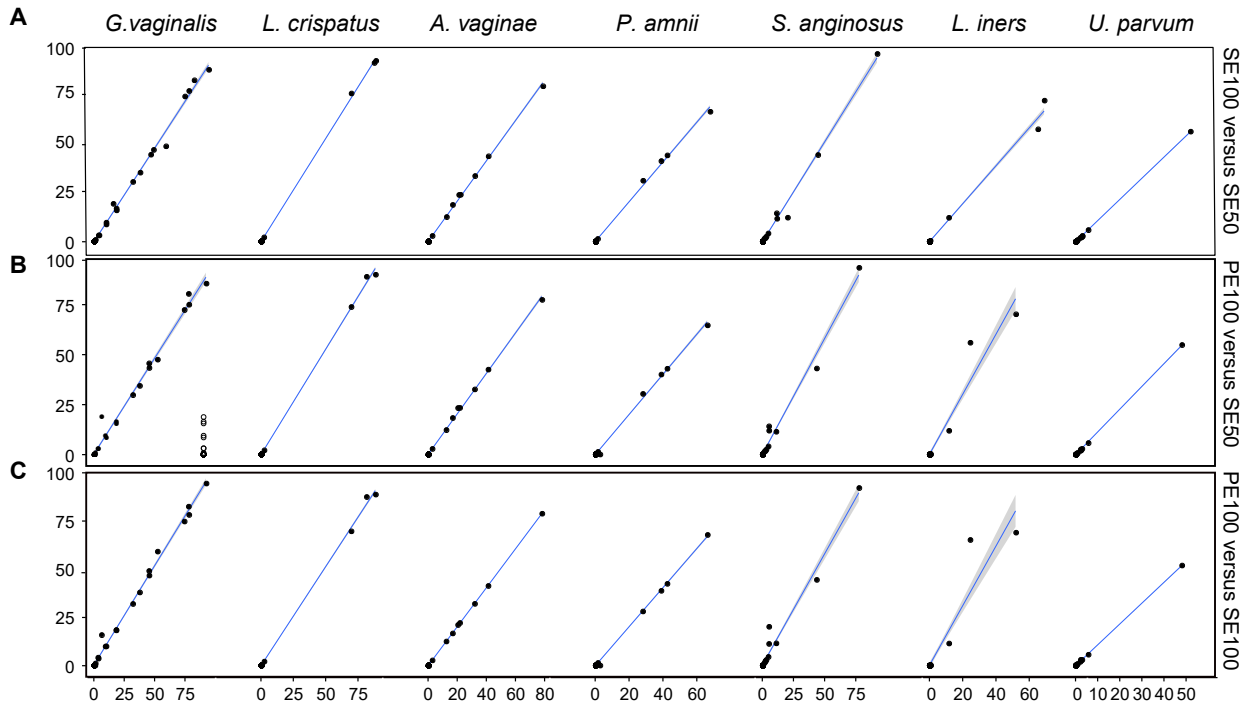

Supplement: mmc6.pdf [file mmc6.pdf]
