# Supplementary material for: Life History Recorded in the Vagino-cervical Microbiome Along with Multi-omes
Source: PubMed Central journal article supplement (PMC9684086; doi:10.1016/j.gpb.2021.01.005), 2021-06-09
Supplement: mmc9.pdf [file mmc9.pdf]

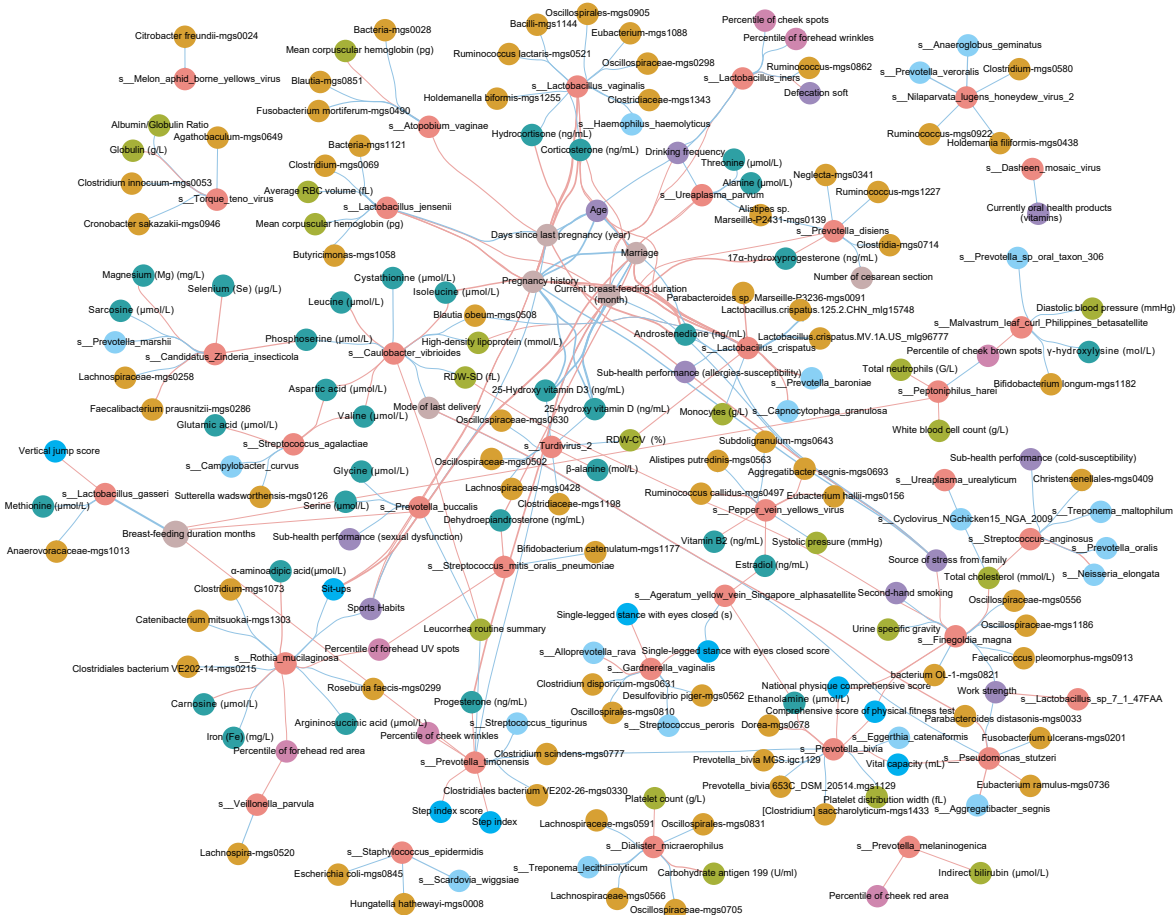

- Vagino-cervical microbiome
- Metabolites
- Physical fitness test
- Facial skin feature
- Lifestyle questionnaire
- Female life history questionnaire
- Fecal microbiome
- Salivary microbiome
- Medical test
